# Supplementary material for: Water-soluble quaternized copolymers as eco-friendly cationic modifiers of cotton fabrics for salt-free reactive dyeing applications
Source: Research Square preprint supplement (doi:10.21203/rs.3.rs-2280432/v1), 2022-11-23
Supplement: Supplementary file 1 [file ecb1affe128b9b4ec7608d19.docx]

Supplementary Information

Water-soluble quaternized copolymers as eco-friendly cationic modifiers of cotton fabrics for salt-free reactive dyeing applications

Loukia Tsimpouki1, Konstantinos Papapetros2, Charalampos Anastasopoulos1, Labrini Sygellou2, Amaia Soto-Beobide2, Konstantinos S. Andrikopoulos3,2, George A. Voyiatzis2, Georgios Bokias1*, Joannis K. Kallitsis1

1Department of Chemistry, University of Patras, GR-26504, Patras, Greece

2Foundation for Research and Technology – Hellas (FORTH), Institute of Chemical Engineering Science (ICE-HT), Stadiou St., P.O. Box 1414, GR 265 04 Rio-Patras Greece

3Department of Physics, University of Patras, GR-265 04 Rio-Patras, Greece

**S1. Assignment of Raman and FTIR bands of polymers**

| Table S1. Suggested assignment of the major vibrational bands appearing in the ATR-FTIR and Raman spectra of P(VBC-co-VBCTEAMx) | | | | |
| --- | --- | --- | --- | --- |
|  | **VBC** | | **VBCTEAM** | |
| Assignment | **ATR-FTIR**  **cm-1** | **Raman**  **cm-1** | **ATR-FTIR**  **cm-1** | **Raman**  **cm-1** |
| *CH str 1-4 para ring* | 3049 vw | 3054 s | 3054 vw | 3055 s |
| *CH str 1-4 para ring* |  | 3036 w–sh |  | ~3040 w–sh |
| *CH2 asym str [-CH2Cl]* | ~3010 w | 3006 m |  |  |
| *CH3 asym str* |  |  | 2984 m | 2988 vs |
| *CH3 sym str* |  |  | ~2940 vw–sh | 2947 vs |
| *CH2 sym str [-CH2Cl]* | 2957 vw–sh | 2958 m |  |  |
| *CH2 asym str, main chain (/tertiary amide)* | 2918 m | 2912 m | ~2925 m | ~2925 w–sh |
| *CH2 sym str, main chain (/tertiary amide)* | 2849 vw | 2853-2863 w | 2850 vw | 2855 w |
| *1-4 para ring str* | 1611 w | 1612 vs | 1612 ms | 1612 vs |
| *1-4 para ring str* | 1573 vw | 1577 vw | 1573 vw | 1574 vw |
| *1-4 para ring str* | 1510 m | 1511 vw | 1513 s | 1512 vw |
| *CH3 asym def* |  |  | 1482 s | ~1482 w–sh |
| *CH2 def {quaternary amine}* |  |  | 1454 s | 1457 m |
| *CH2 def [-CH2Cl]* | 1442 m | 1445 mw |  |  |
| *Aliphatic bending modes* | 1420 m | 1421 vw–sh |  |  |
| *CH3 def [quaternary amine]* |  |  | 1396 s | 1394 vvw |
| *Aliphatic bending modes* |  |  | 1368 m | 1366 vvw |
| *Aliphatic bending modes* | 1312 vw | 1318 vw | 1306 vw | ~1310 w |
| *CH2 wagging [-CH2Cl]* | 1264 s | 1266 ms |  |  |
| *CH in plain 1-4 para ring def* | 1212 vw | 1212 m | 1217 w | 1215 m |
| *Aliphatic bending modes* |  |  |  | 1190 s |
| *CH2 twisting [-CH2Cl]* | 1182 vw | 1183 ms | 1184 w |  |
| *Aliphatic bending modes* |  |  | 1156 m | 1156 mw |
| *CH3 rocking [quaternary amine]* |  |  | 1010 s | 1011 w |
| *C-N asym [quaternary amine]* |  |  | 930 vw | 928 mw |
| *C-N asym [quaternary amine]* |  |  | 903 w | 903 vw |
| *CH out-of-plane 1-4 para ring def* | 835 m–sh | 836 m | 845 w–sh | 844 mw |
| *CH out-of-plane 1-4 para ring def* | 821 s | 811 w–sh | 828 w | ~830 w–sh |
| *CH2 rocking or C-N sym [quaternary amine]* |  |  | 782 vs | 787 w |
| *CH2 rocking [-CH2Cl]* | 743 w | 745 w |  |  |
| *CH2 rocking or C-N sym [quaternary amine]* |  |  | 681 w | 681 m |
| *C-Cl str [-CH2Cl]* | 671 vs | 675 m |  |  |
| *In-plane 1-4 para ring def* | 638 w | 638 m |  | 642 m |
| *C-Cl def [-CH2Cl]* |  | 345 w |  |  |

**S2. Effect of X-Rays on fabrics**

*Irradiation of unmodified and modified fabrics with X-Rays results in alteration of the population of chemical species identified on the surface. The alteration is progressive, depends on time of irradiation as well as the existing modification. Macroscopically colour alteration may be visually observed at prolong irradiation times (Figure S1).*

| 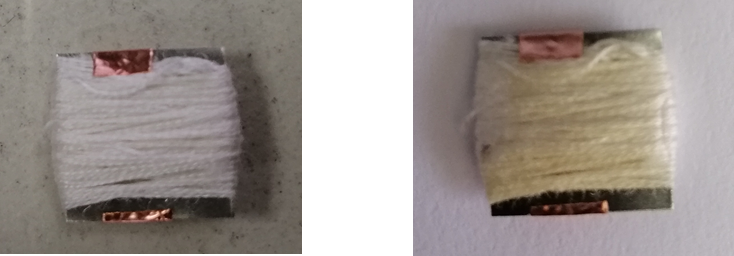 |
| --- |
| ***Figure S2.1.*** *Color alteration of Cotton fibers before and after X-Ray irradiation in the XPS chamber.* |

*The most affected elements were found to be Cl and N while C was the least affected. Systematic experiments on irradiated samples were performed in order to evaluate signal deterioration as a function of time. Indicative spectra of PVBC and PVBCTEAM in the C1s, Cl2p and N1s spectral regions as a function of irradiation time are given in Figure S2.*

|  |  |  |
| --- | --- | --- |
| ***Figure S2.2.*** *Progressive intensity alterations of the XPS peaks from modified fabrics as a function of irradiation time.* | | |

*In the C1s envelope, the C-O-C band (286.6 eV) is only weakly affected while the intensity of all the other bands is basically constant with time. On the other hand, the intensity of the Cl2p and the quaternary N1s bands are critically affected by irradiation. Figure 3S depicts the intensity of the aforementioned bands as a function of irradiation time. From the two calibration curves appearing in the figure, it becomes clear that for a 15 mins measurement there is a ~25% decrease in the recorded intensity for both Cl2p and N1s. Corrected intensity values may be obtained taking into account the denoted fitting curves.*

|  |  |
| --- | --- |
| *(a)* | *(b)* |
| ***Figure S2.3.*** *Calibration curve of the XPS intensity for (a) the Cl anion (197 eV) and (b) the quaternary N1s (402 eV) as a function of time.* | |

*Since N+ and Cl and Cl- are the most critical elemental entities that define the physicochemical processes developed during of textile modification, a specific methodology was applied i.e. measuring first the Cl, Cl- spectral region, next the N+, N region and finally the C region. All measurements were performed at the minimum time that allowed acceptable signal to be collected.*

**S3. Polymer exhaustion studies**


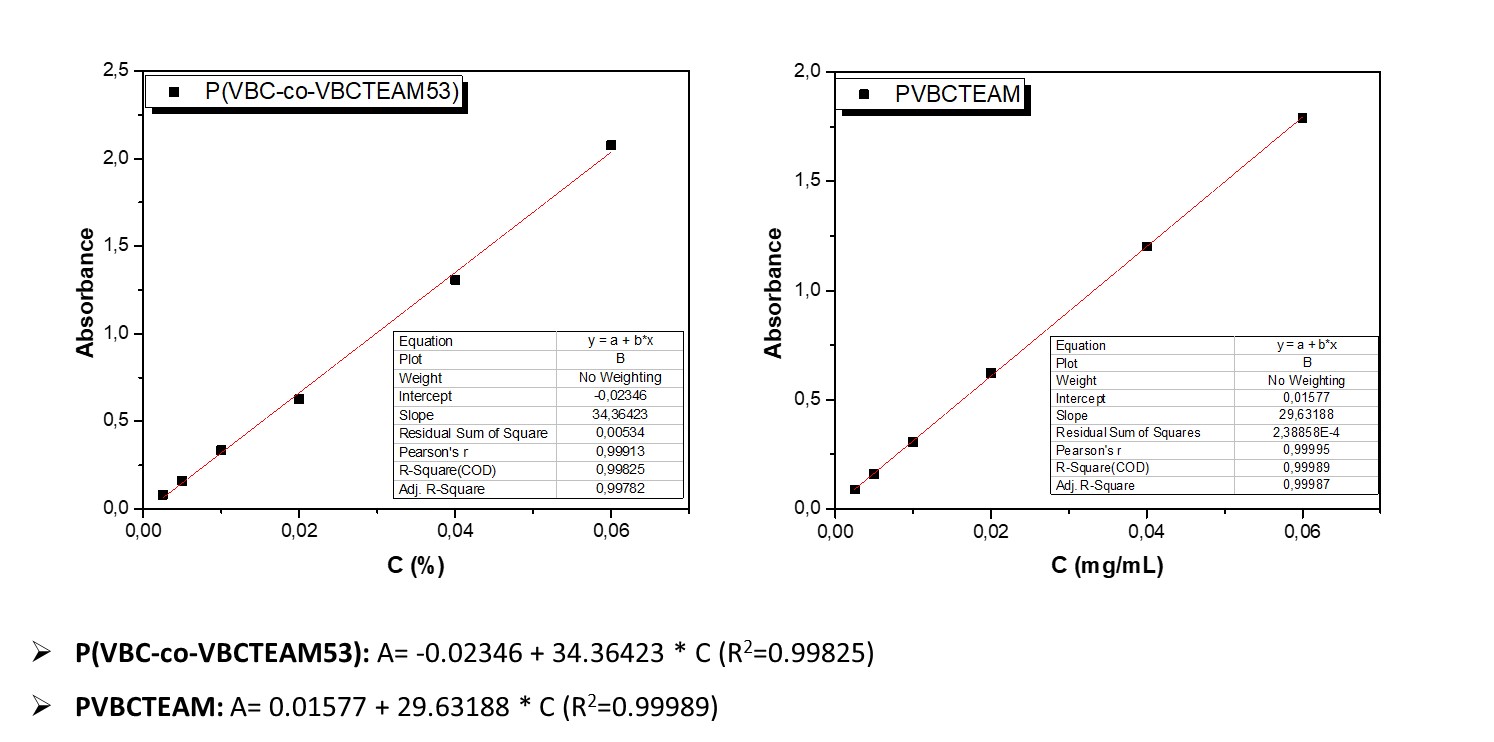


**Figure S3.** Calibration curves of PVBC-co-VBCTEAM53) (left) and PVBCTEAM (right) in aqueous alkaline solutions. The concentration is given as w/v.

**S4. Dye exhaustion studies**

**Figure S4.** UV-vis spectra (a) and calibration curve of Novacron Ruby NRS-3B in aqueous alkaline solutions. The concentration is given as w/v.
